# Supplementary material for: Tieguanyin extracts ameliorated DSS-induced mouse colitis by suppressing inflammation and regulating intestinal microbiota
Source: Royal Society of Chemistry journal article supplement (doi:10.1039/d2fo02781j), 2022-01-01
Supplement: d2fo02781j1.pdf [file d2fo02781j1.pdf]

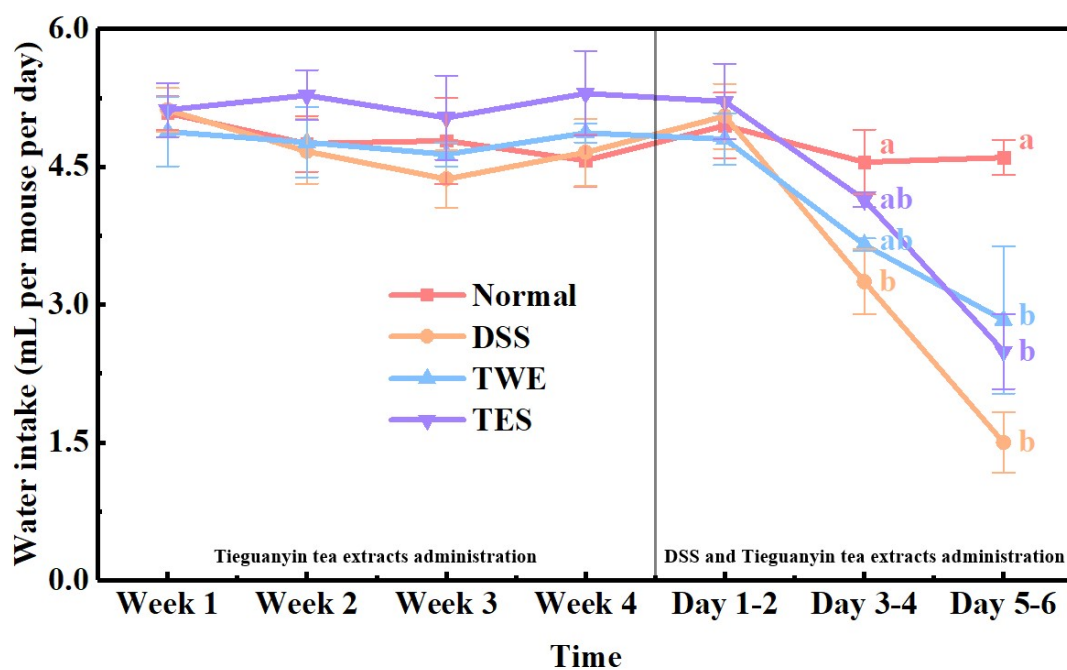

Supplementary material:

Figure S1: Daily water intake of each group from week1-4 and every two days of week 5.
